# Supplementary material for: A Clean and Tunable Mussel-Inspired Coating Technology by Enzymatic Deposition of Pseudo-Polydopamine (ψ-PDA) Thin Films from Tyramine
Source: Int J Mol Sci. 2020 Jul 10;21(14):4873. doi: 10.3390/ijms21144873 (PMC7402308; doi:10.3390/ijms21144873)
Supplement: Supplementary file 1 [file ijms-21-04873-s001.pdf]

## Supporting Information

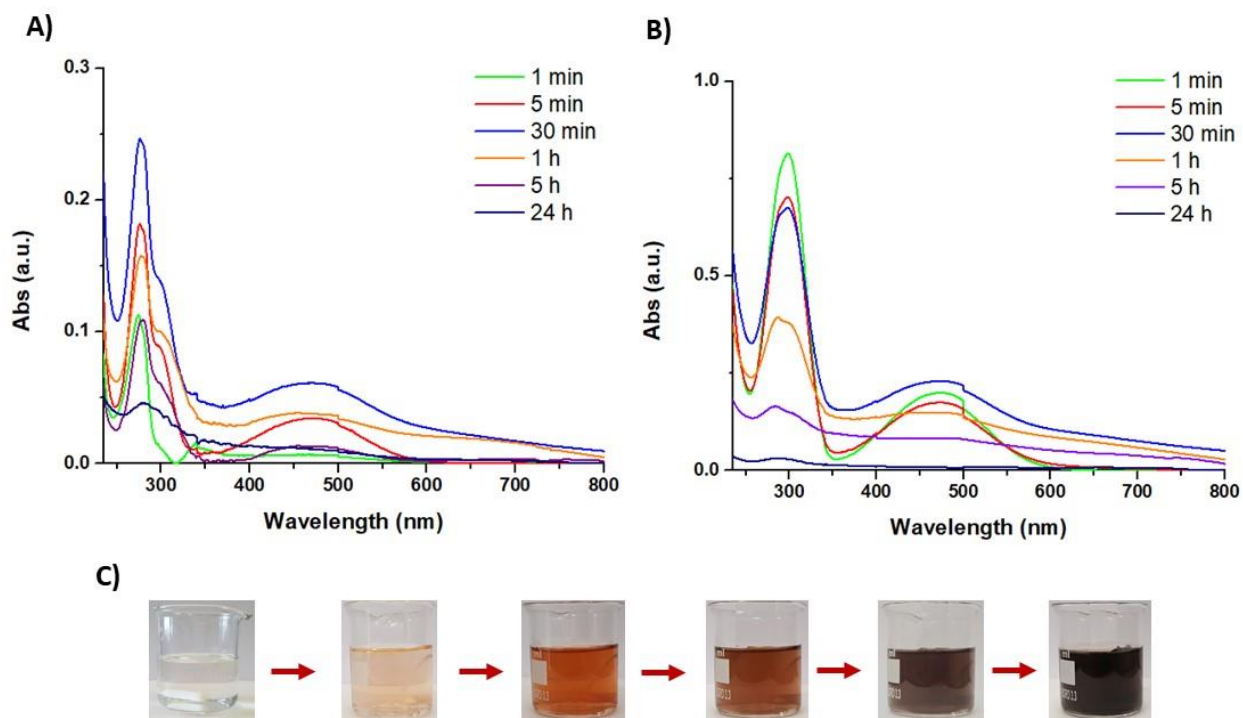

**Figure S1.** Evolution of the UV-vis absorption spectra of tyramine solutions (1 mM) (A) and dopamine solutions (B) during the enzymatic reaction in carbonate buffer at pH 6.8 over 24 h (diluted 10-fold before the measurement of the spectrum). (C) Digital pictures of catecholamine oxidation in the presence of 20 U/mL of tyrosinase.

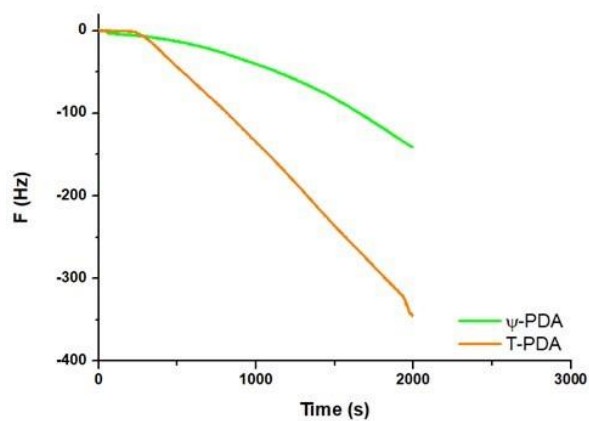

**Figure S2.** Kinetics of film deposition of tyramine or dopamine in the presence of 20 U/mL of tyrosinase.

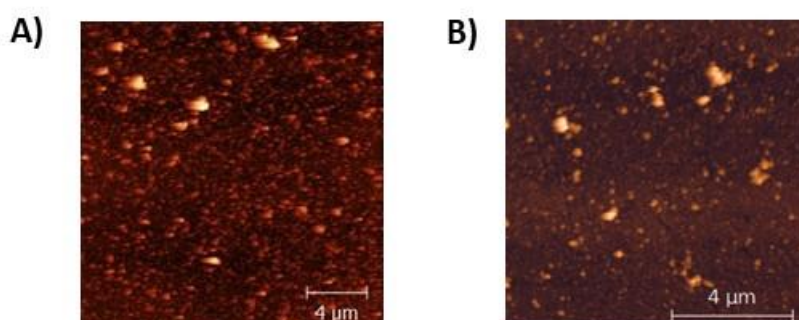

**Figure S3.** AFM image of a representative region of the  $\psi$ -PDA film sample, after 1 h of deposition onto the quartz crystal sensor, in the presence of 50 U/mL (A) and 100 U/mL (B) tyrosinase, respectively. Roughness: 28.7 nm (A), 12.8 nm (B). Film thickness:  $63.3 \pm 5$  nm (A),  $58 \pm 4$  nm (B).

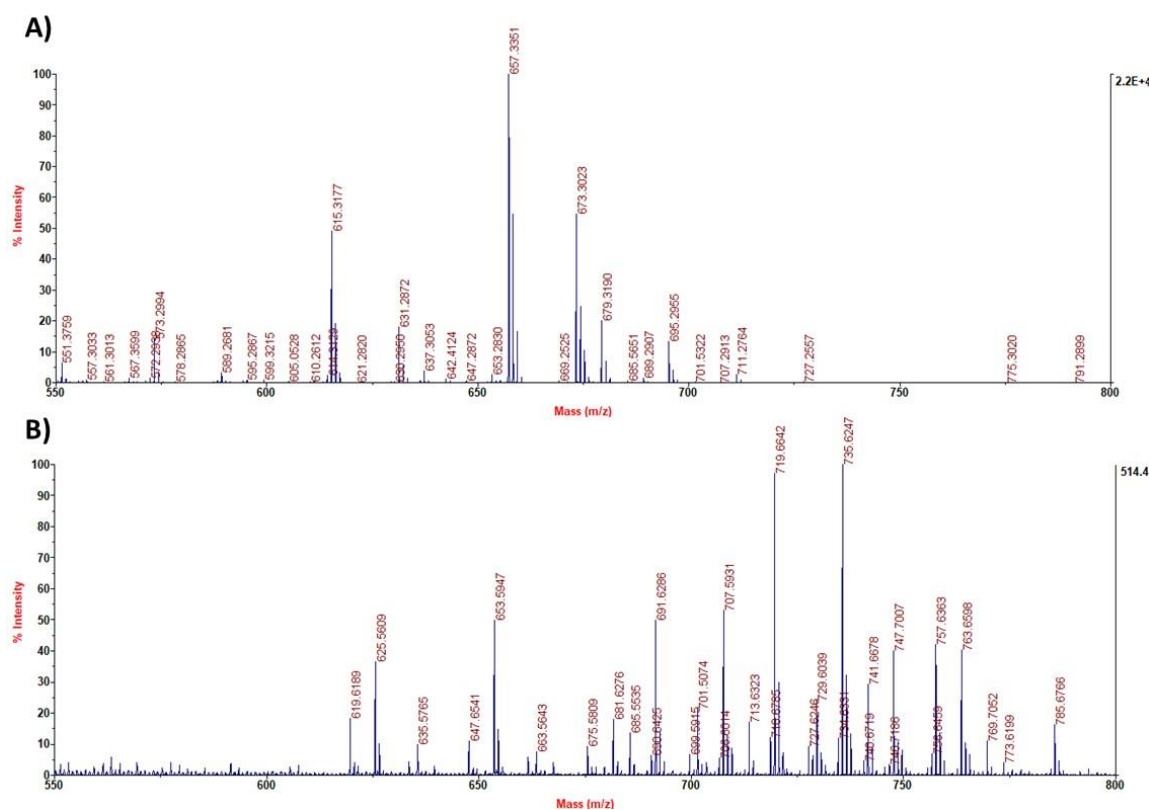

**Figure S4.** Segmental spectra of MALDI-ToF ( $m/z$ : 550–800 Da) characterizations of (A) tyramine film in carbonate buffer at pH = 6.8 with 20 U/mL of tyrosinase and (B) PDA film obtained under the same conditions.

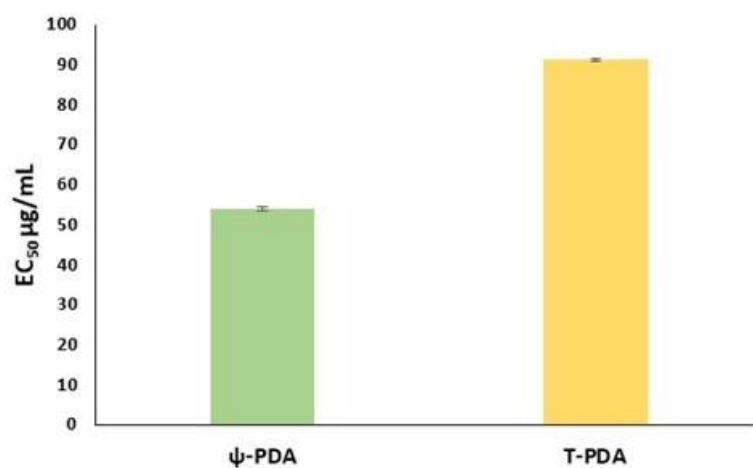

**Figure S5.** EC<sub>50</sub> values obtained from the DPPH assay of the samples obtained by oxidation of tyramine and dopamine in the presence of 20 U/mL of tyrosinase (2 mg/mL). The average values  $\pm$  SD obtained from at least three separate experiments are reported.

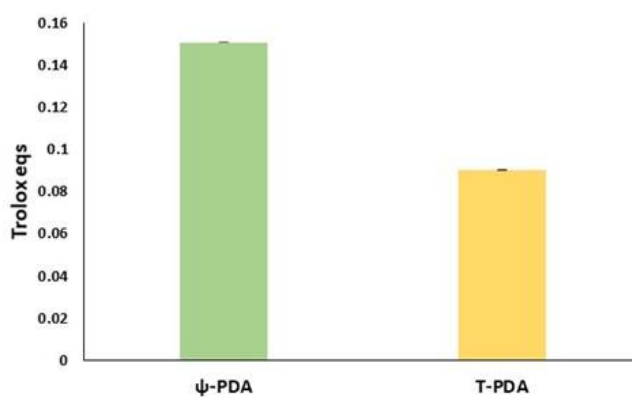

**Figure S6.** Trolox equivalents determined in the FRAP assay of the samples obtained by oxidation of tyramine and dopamine in the presence of 20 U/mL of tyrosinase (2 mg/mL). The average values  $\pm$  SD obtained from at least three separate experiments are reported.

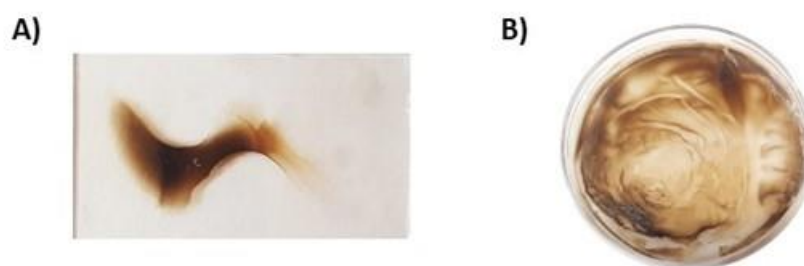

**Figure S7.** Calcium alginate hydrogel films on glass (A) or polystyrene (B) loaded with an 1% aqueous solution of tyrosinase and dipped into tyramine solution (1 mM) for 2 h.
